# Supplementary material for: The mode of expression divergence in Drosophila fat body is infection-specific
Source: HighWire-hosted journal article supplement (doi:10.1101/gr.269597.120), 2021-04-15
Supplement: Supplemental_Materials.pdf [file Supplemental_Materials.pdf]

## Supplemental Materials

### The mode of expression divergence in *Drosophila* fat body is infection-specific

Bryan A. Ramirez-Corona, Stephanie Fruth, Oluchi Ofoegbu, Zeba Wunderlich\*

Department of Developmental and Cell Biology, University of California, Irvine, CA

\*Corresponding Author:  
[zeba@uci.edu](mailto:zeba@uci.edu)

#### Table of Contents:

|                                  |                     |
|----------------------------------|---------------------|
| <b>Supplemental Methods</b>      | <b>Pages 2 - 3</b>  |
| <b>Supplemental Figure S1-S5</b> | <b>Page 4 - 9</b>   |
| Supplemental Figure S1           | Page 4              |
| Supplemental Figure S2           | Page 5              |
| Supplemental Figure S3           | Page 6              |
| Supplemental Figure S4           | Page 7              |
| Supplemental Figure S5           | Page 8 - 9          |
| <b>Supplemental Table S1-S5</b>  | <b>Page 10 - 19</b> |
| Supplemental Table S1            | Page 10 - 11        |
| Supplemental Table S2            | Page 12             |
| Supplemental Table S3            | Page 13 - 15        |
| Supplemental Table S4            | Page 16 - 18        |
| Supplemental Table S5            | Page 19             |
| <b>Supplemental References</b>   | <b>Page 20</b>      |

## Supplemental Methods

### Survival and Bacterial load tracking of A4 and B6 lines.

To more effectively ascertain differences in survival, we used lower doses of bacteria for the survival analysis than for the RNA-seq analysis (5,000 CFUs of *E. faecalis* or 1,000 CFUs of *S. marcescens*). Once per day following infection, the survival status of the flies was recorded and the bacterial load was measured via dilution plating of a live flies as in (Khalil et al., 2015; Supplemental Figure S1). Kaplan-Meier estimates of survival were calculated using the `survival 3.2-3` package in R (Therneau et al., 2000; Therneau et al., 2020), and log-rank tests and plotting were performed using the `survminer 0.4.4` package (Kassambara and Kosinski 2019).

### Filtering low confidence annotations from A4 and B6 transcriptome annotations.

To assess the quality of our annotations and remove genes with poor annotations, genomic sequencing reads for A4 and B6 from the DSPR website were downloaded and aligned to our transcriptome files using Salmon 0.12.0 aligner (Thurmond et al., 2019). We hypothesized that well-annotated genes would show similar coverage of genomic reads in both the A4 and B6 transcriptomes. We then filtered genes using two methods for outlier calling: a Poisson distribution-based method and a negative binomial generalized linear model (GLM) method, similar to that used for differential gene expression in RNA-seq experiments. For the Poisson method, we fitted a Poisson distribution to gene count data for the A4 and B6 transcriptomes separately, using the `fitdistributionplus 1.0-14` package in R and called outlier genes using three thresholds of increasing stringency  $p = 0.001$ ,  $0.01$  and  $0.025$  (Delignette-Muller & Dutang 2015). For the GLM-based approach, we looked for gene counts that were significantly different between the A4 and B6 transcriptomes and filtered genes using FDR thresholds of  $0.01$ ,  $0.05$  and  $0.09$ . As our threshold for significance became more stringent, we filtered out an increasing number of genes but the differences between the final filtered sets show about a 3% difference in terms of total genes and less than 1% difference in genes shown to be differentially expressed (Supplemental Figure S2). Genes found not to be

outliers in either the Poisson or GLM method were then combined into gene sets based on the stringency of filtering. These gene sets were then used to quantify *cis* and *trans* effects for all three conditions. We found that the stringency of filtering did not significantly impact the total number or proportions of *cis* and *trans* effects between conditions. For the allele-specific expression analysis presented in Figure 3, we used a set of genes filtered using a combination of both methods at medium stringency.

### **Assessing accuracy of ASAP allele calling using X Chromosome reads.**

To verify the accuracy of our quantification allelic expression in F1 hybrids, we used the RNA-seq data from the A4 and B6 parental lines and data from the F1 hybrids (A4 ♂ x B6 ♀) and reciprocal crosses (B6 ♂ x A4 ♀), in the control, *Efae*-infected, and *Smar*-infected conditions. Since we are using males, if our allele-specific expression analysis is correct, none of the X Chromosome reads should map to the paternal genotype. Using the published A4 and B6 genomes and the Allele-Specific Alignment Pipeline (ASAP) (Krueger, <https://www.bioinformatics.babraham.ac.uk/projects/ASAP/>), we quantified the fraction of X Chromosome reads that incorrectly map to the paternal genotype. On average, samples had 0.5% mis-assigned reads (standard deviation = 3%), with the highest fraction being 1.2% (Supplemental Table S1). The consistent, low level of mis-assigned reads verifies our ability to accurately quantify allelic expression. Given that all the flies are male, any reads aligning to the paternal X Chromosome can definitively be classified as mis-assigned.

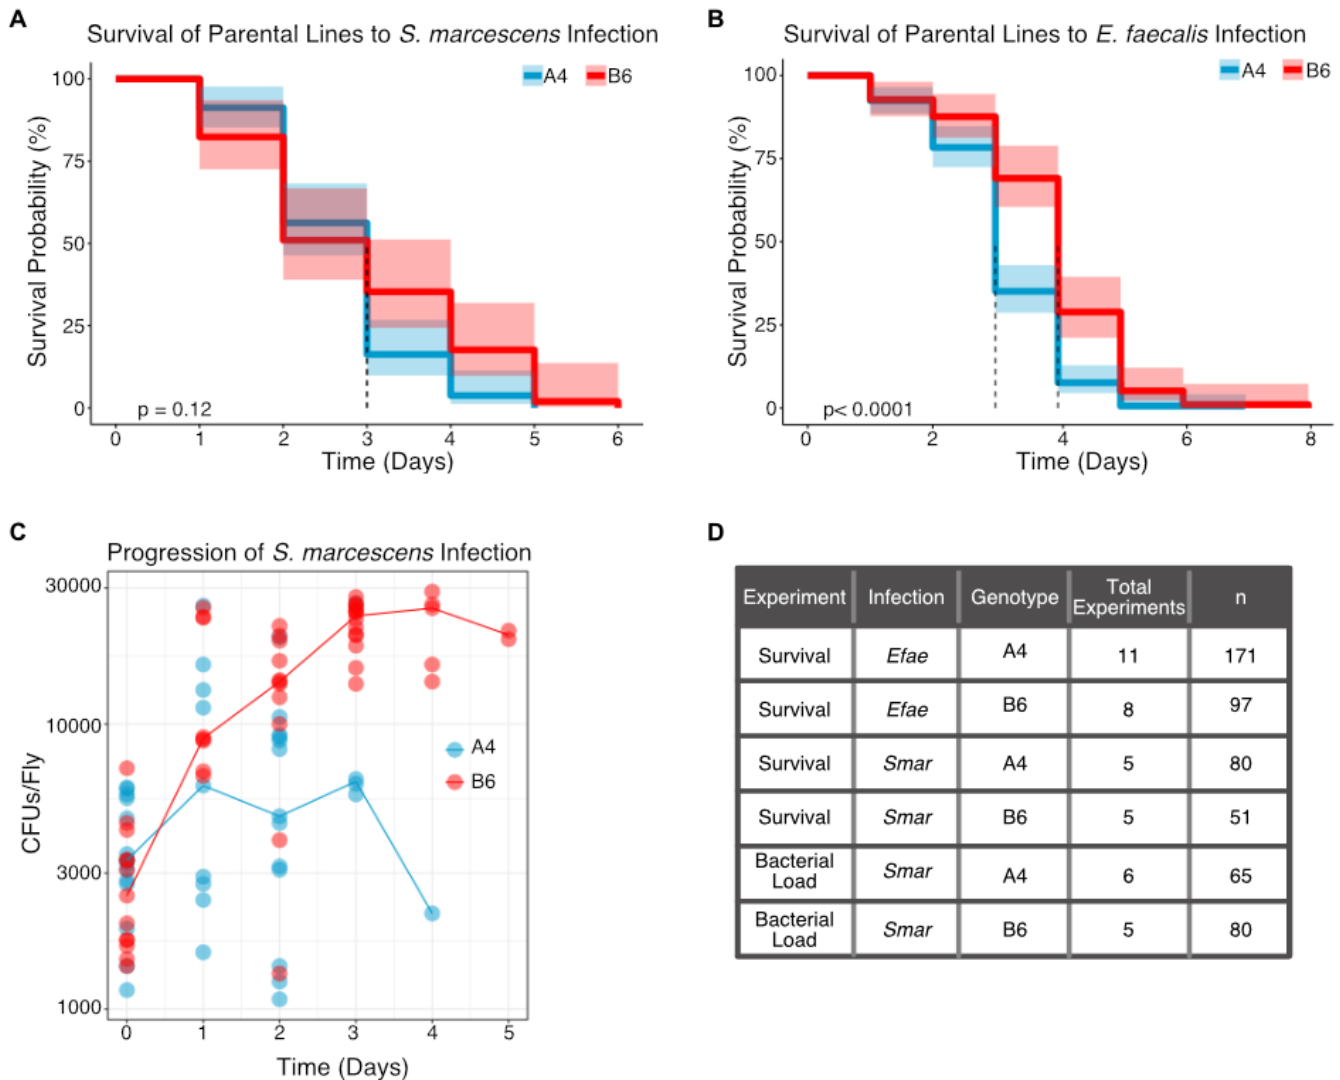

**Supplemental Figure S1: A4 and B6 lines show differences in survival in response to Gram-positive but not Gram-negative infection.**

A) Survival curves and confidence intervals for flies infected with an average 1000 CFUs of *S. marcescens*, observed once per day. P-value was calculated using a log-rank test. B6 flies survive *Efae* infection for longer than the A4 flies. B) Survival curves and confidence intervals for flies infected with approximately 5000 CFUs of *E. faecalis*, observed once per day. P-value was calculated using a log-rank test. There is no significant difference in infection survival between the two genotypes. C) Bacterial load of A4 and B6 lines in response to *S. marcescens* infection, assessed by dilution plating of homogenized infected flies. Points represent a single animal's bacterial load measurement (an average of three technical replicates per animal), and solid lines indicate the median values of bacterial load for each day. Though the flies do not show a significant difference in survival, it appears that A4 shows greater resistance to *Smar*, while B6 shows greater tolerance of the infection. D) Table showing sample sizes for the results depicted in this figure.

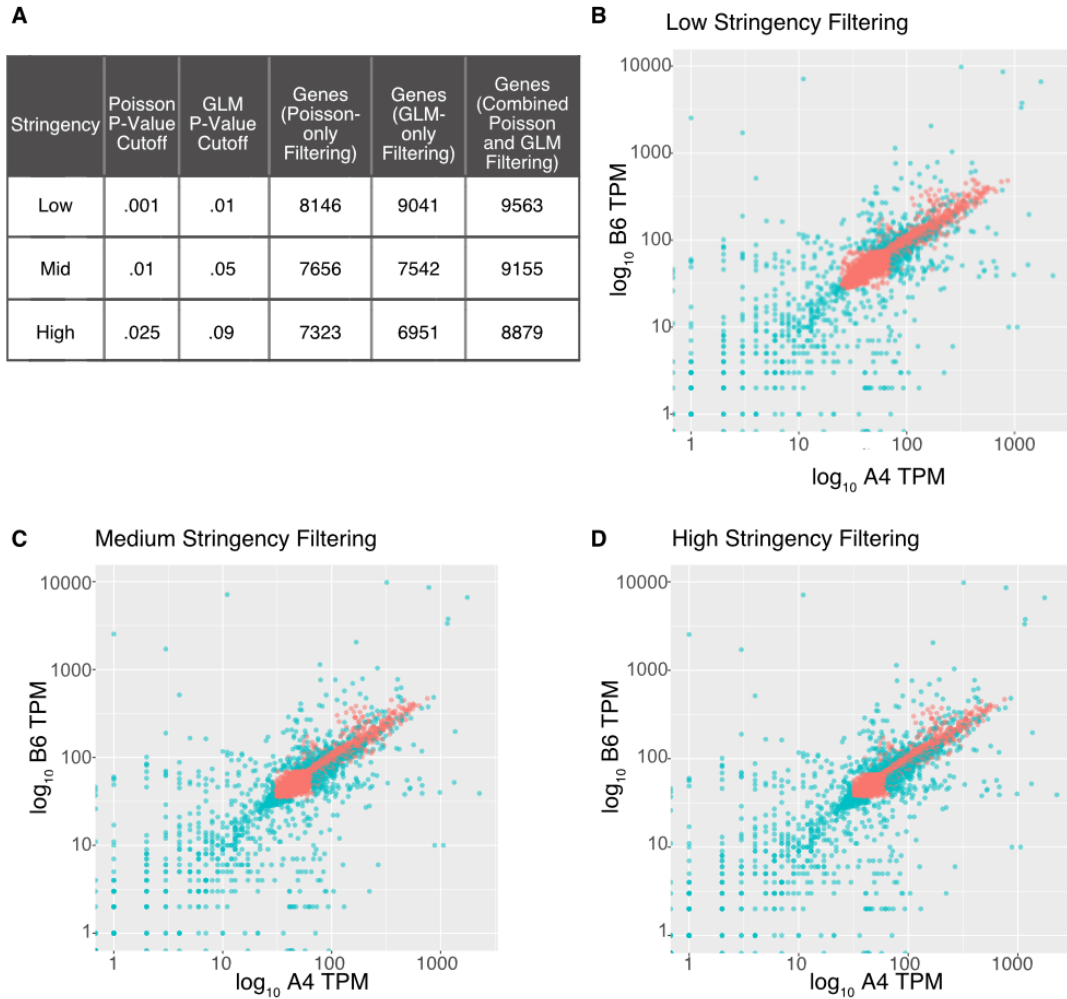

**Supplemental Figure S2: Differences in assembly quality minimally affect *cis* and *trans* effects in downstream analysis.**

To quantify the effects of assembly quality of on *cis* and *trans* effects, we filtered out genes with poor annotations at increasingly restrictive thresholds and quantified differences in *cis* and *trans* effects (Supplemental Table S2). We identified potentially problematic genes by aligning A4 and B6 genomic reads to their respective transcriptomes. We posited that each gene of the lifted over transcriptome should receive roughly the same amount of coverage once normalized for gene length and that genes deviating from this coverage were poorly annotated. We used two methods for calling outlier genes: a Poisson distribution-based method and a GLM based method (see Methods for details). A) Here we report the non-outlier (retained) gene numbers for different methods and degrees of stringency. The gene numbers do not decrease rapidly with increasing stringency. B-D) These graphs plot the gene counts in transcripts per million (TPM) using the A4 and B6 genomic reads mapped to their respective transcriptomes. Outlier genes are shown in teal and retained genes are shown in pink. The quantification of *cis* and *trans* effects for these different gene sets are shown in Supplemental Table S2.

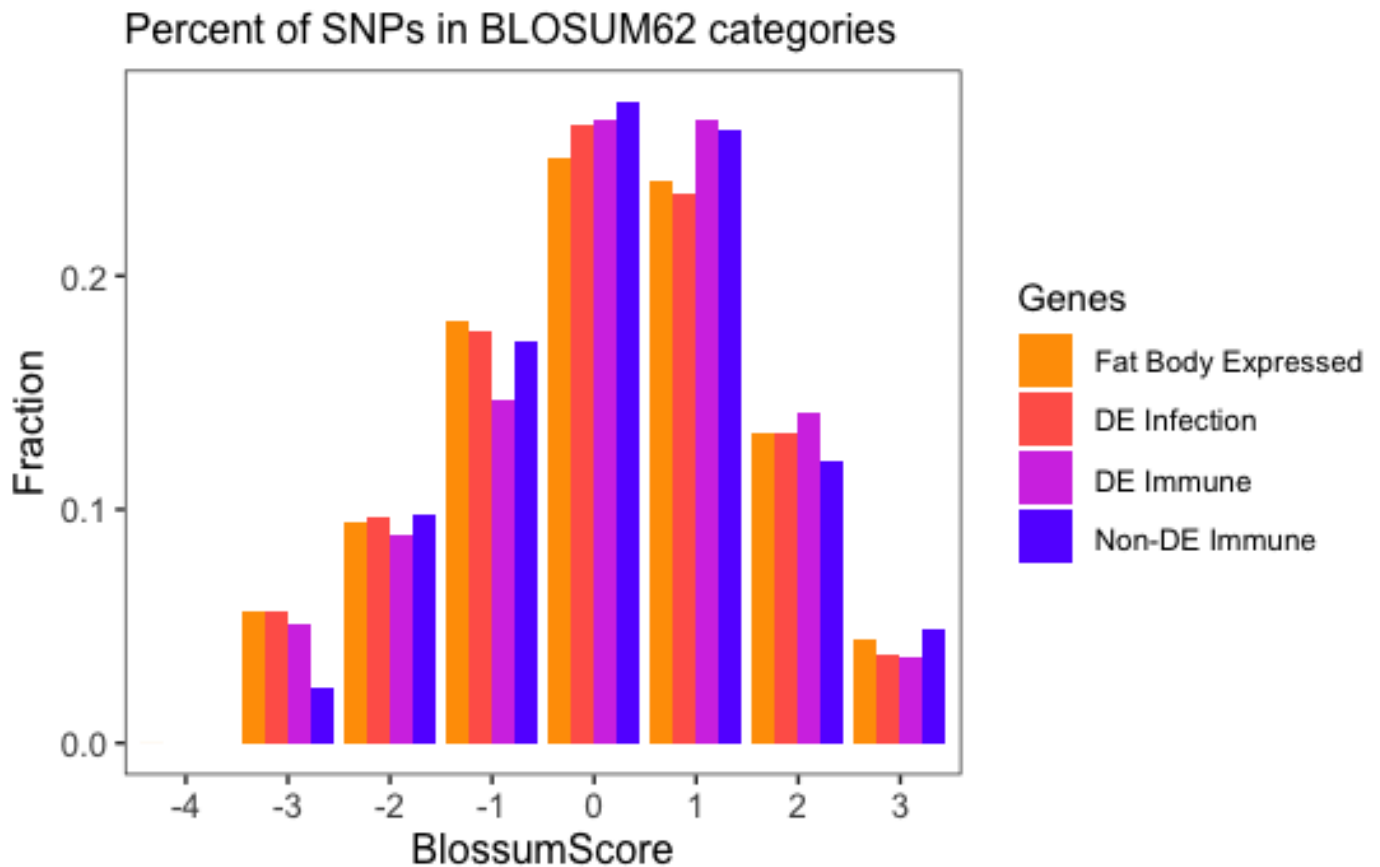

**Supplemental Figure S3: Most nonsynonymous mutations have non-negative BLOSUM62 scores.**

As a coarse-grained approximation of the effects of non-synonymous changes on protein function, we analyzed the distribution of BLOSUM62 scores for the four gene sets described. The BLOSUM62 score is a homology-based metric that describes the likelihood of a particular residue change, positive numbers indicate frequently observed changes, while negative numbers indicate rare amino acid substitution (Pearson 2013). For all gene sets, non-negative scores dominate, with 67% for *fat body detected*, 67% for *DE infected*, and 71% for *DE immune*, 55% Non-DE immune. This suggests that there are some nonsynonymous mutations that may alter protein function, but the fraction of these disruptive mutations does not significantly differ between gene sets.

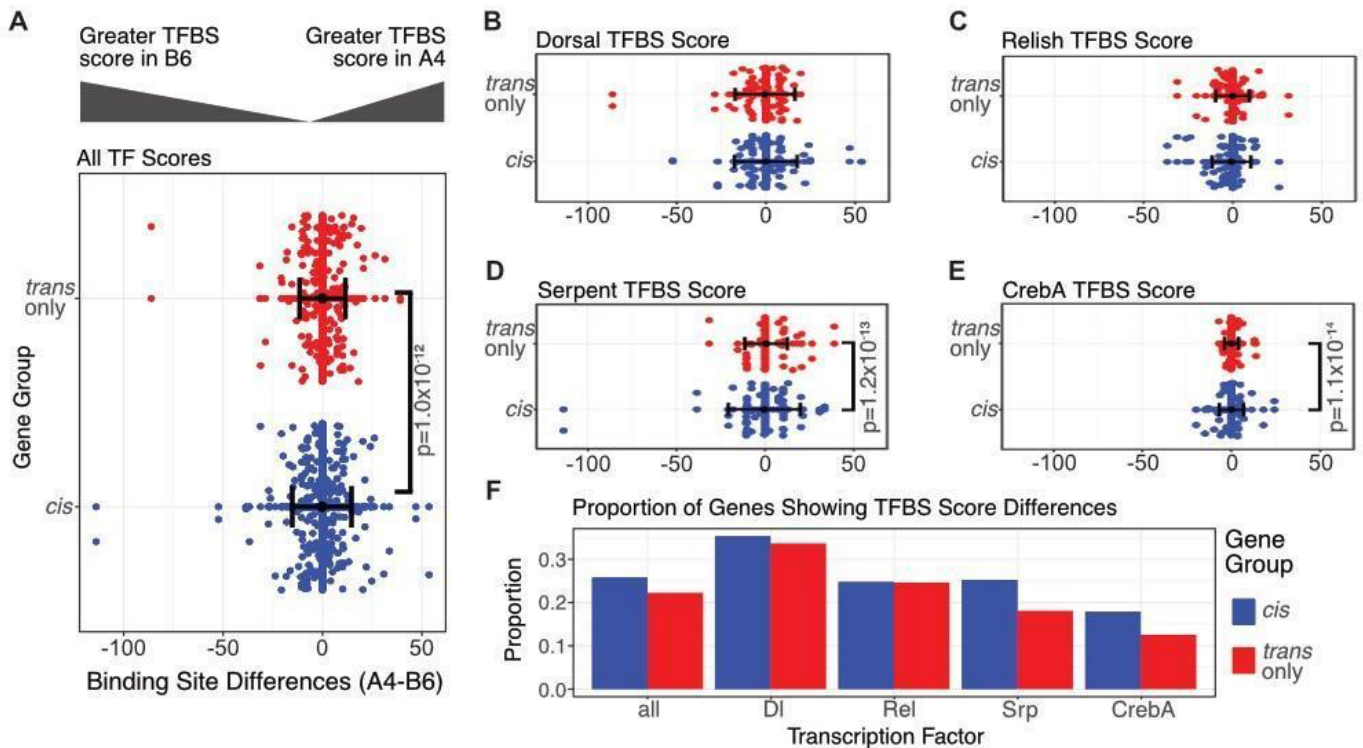

**Supplemental Figure S4: There are greater differences in TFBS score in *cis* affected genes than *trans* affected genes.**

A) We quantified TFBS score for four immune responsive transcription factors: DI, Rel, Srp and CrebA in 1kb region upstream of 219 *cis* affected genes and 199 *trans* affected genes. The differences in total TFBS score in the B6 and A4 upstream regions were calculated for each gene. We find that variance in the distribution of these differences is greater in genes showing *cis* effects (F-test to compare distribution variances, Bonferoni corrected). We then looked at the distribution of these differences for each of the four transcription factors separately. B-C) The variances in the score difference distributions for DI and Rel were not significantly different between genes showing *cis* effects and *trans* effects. D-E) The variances of the score differnt distributions for Srp and CrebA are significantly differet between genes showing *cis* effects and *trans* effects. F) A higher fraction of genes showing *cis* effects had differences in total TFBS score than genes showing *trans* effects, though these fractions were not significantly different.

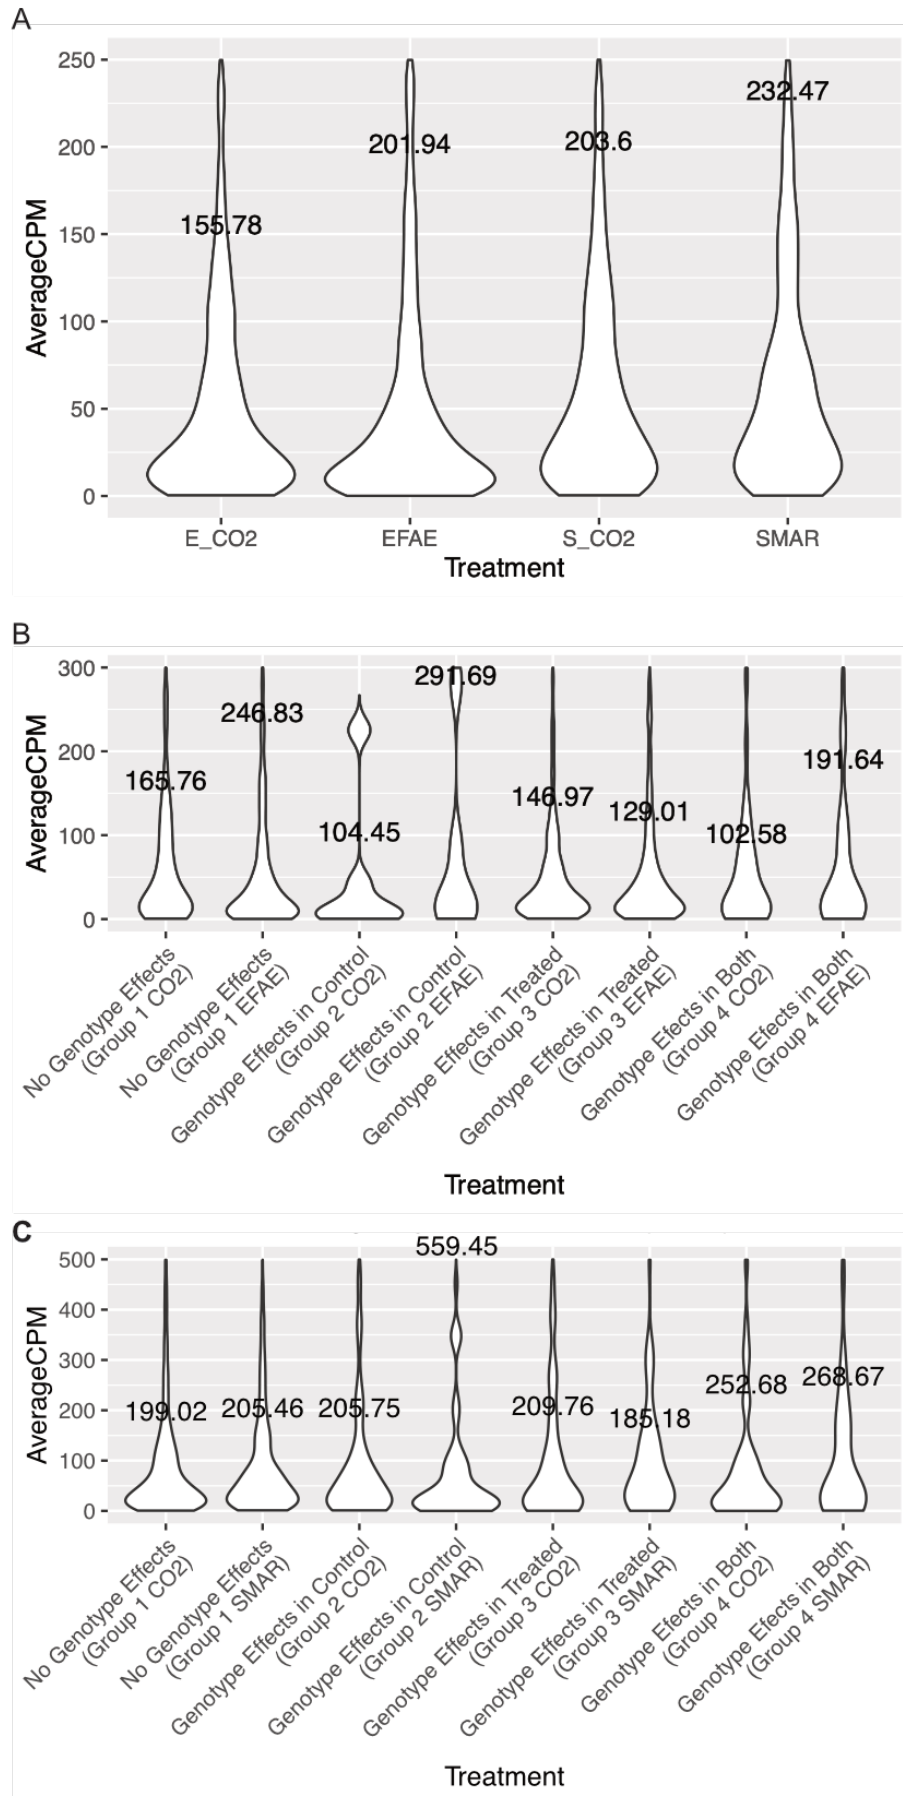



**Supplemental Figure S5: Average CPM for genes across different identified gene groups.**

A) To determine if absolute expression between immune stimulated and control samples may be biasing our ability to detect genotype-specific effects, we looked at average CPM values for differentially expressed genes in both infection conditions. Specifically, we wanted to ensure that we were not finding more expression divergence effects in the infected samples because genes have higher expression in response to infection than in the control condition. The expression levels of differentially expressed genes in *Efae* (1165 genes) and *Smar* (1203 genes) conditions were compared to the corresponding genes in the control samples, *E\_CO2* and *S\_CO2* respectively (Supplemental Code, Script1\_fig1). We performed two-sided Wilcoxon rank-sum tests to compare average CPM values from immune stimulated samples to average cpm values of the corresponding genes in the control conditions. Using a p-value threshold of  $p=0.05$  we found no significant differences in average CPM of infection-responsive genes between treated samples and untreated controls (two-sample Wilcoxon rank sum test, Bonferroni corrected). B) Here we show average CPM values for each of the four gene groups showing different genotype effects in response to *Efae* infection (as shown in Figure 1). We do not observe a significantly different average CPM between treated and control conditions (two-sample Wilcoxon rank sum test, Bonferroni corrected). C) Here we show average CPM values for the four gene groups showing different genotype effects in response to *Smar* infections (as shown in Figure 1). No group shows significance in average CPM value between the treated and control samples (two sample Wilcoxon rank sum test, Bonferroni corrected).

**Supplemental Table S1: Sample read numbers and alignment statistic.**

Sample treatment categories are uninfected (control), *E. faecalis*-infected (*Efae*) and *S. marcescens*-infected (*Smar*). Genotype of samples are listed to indicate hybrid cross order: male genotype is listed first and female genotype second. We also show counts of 43bp paired end reads for each sample before and after alignment, percentages for A4 and B6 uniquely mapping reads, and percentages of mis-assigned X Chromosome reads (total mis-assigned X Chromosome reads over total X Chromosome genotype-specific reads).

| Sample | Treatment   | Genotype<br>♂/♀ | Total<br>Reads | Mapped<br>Reads | %<br>Uniquely<br>Aligned to<br>A4 | %<br>Uniquely<br>Aligned to<br>B6 | % Mis-assigned to X<br>Chromosome |
|--------|-------------|-----------------|----------------|-----------------|-----------------------------------|-----------------------------------|-----------------------------------|
| 1      | control     | A4              | 26369673       | 24364366        | 9.4                               | 0.1                               | 0.3                               |
| 2      | control     | A4              | 14870917       | 13878016        | 9.5                               | 0.1                               | 0.3                               |
| 3      | control     | A4              | 18732323       | 17558251        | 9.4                               | 0.1                               | 0.3                               |
| 4      | control     | A4              | 34580046       | 32442180        | 10.3                              | 0.1                               | 0.4                               |
| 5      | control     | A4B6            | 41318671       | 19649962        | 5.4                               | 6.4                               | 0.6                               |
| 6      | control     | A4B6            | 41205951       | 19378946        | 5.6                               | 6.6                               | 0.6                               |
| 7      | control     | A4B6            | 53666239       | 50178799        | 4.6                               | 5.5                               | 0.8                               |
| 8      | control     | A4B6            | 82417525       | 65605513        | 5.7                               | 6.4                               | 0.6                               |
| 9      | control     | B6              | 17980721       | 16879587        | 0.4                               | 10.2                              | 0.6                               |
| 10     | control     | B6              | 19997738       | 18798790        | 0.4                               | 8.7                               | 0.8                               |
| 11     | control     | B6              | 19129651       | 17946593        | 0.4                               | 10.4                              | 0.8                               |
| 12     | control     | B6              | 24984658       | 23547941        | 0.3                               | 9.1                               | 1.0                               |
| 13     | control     | B6A4            | 53543764       | 10893030        | 6.0                               | 4.5                               | 0.3                               |
| 14     | control     | B6A4            | 47079732       | 24895491        | 6.7                               | 5.0                               | 0.3                               |
| 15     | control     | B6A4            | 47509119       | 21329979        | 6.3                               | 4.7                               | 0.3                               |
| 16     | control     | B6A4            | 49562943       | 46726476        | 6.0                               | 4.6                               | 0.3                               |
| 17     | <i>Efae</i> | A4              | 11521847       | 10597039        | 10.9                              | 0.0                               | 0.4                               |
| 18     | <i>Efae</i> | A4              | 26211400       | 24598530        | 12.2                              | 0.1                               | 0.4                               |
| 19     | <i>Efae</i> | A4              | 16272150       | 15204121        | 12.0                              | 0.0                               | 0.3                               |
| 20     | <i>Efae</i> | A4              | 24759445       | 23361494        | 11.0                              | 0.1                               | 0.3                               |
| 21     | <i>Efae</i> | A4B6            | 36234287       | 33302637        | 5.4                               | 6.0                               | 0.9                               |
| 22     | <i>Efae</i> | A4B6            | 54770680       | 51649242        | 6.0                               | 6.7                               | 0.5                               |

|    |             |      |          |          |      |      |     |
|----|-------------|------|----------|----------|------|------|-----|
| 23 | <i>Efae</i> | A4B6 | 37724992 | 35152256 | 5.5  | 6.0  | 0.7 |
| 24 | <i>Efae</i> | A4B6 | 52373459 | 49185996 | 7.4  | 8.0  | 0.4 |
| 25 | <i>Efae</i> | B6   | 20269632 | 18651459 | 0.2  | 10.4 | 1.1 |
| 26 | <i>Efae</i> | B6   | 22075327 | 20668129 | 0.3  | 11.9 | 0.5 |
| 27 | <i>Efae</i> | B6   | 28118298 | 26565158 | 0.3  | 9.2  | 1.2 |
| 28 | <i>Efae</i> | B6   | 28488360 | 26831112 | 0.3  | 12.7 | 0.6 |
| 29 | <i>Efae</i> | B6A4 | 43346696 | 39878989 | 5.9  | 4.8  | 0.4 |
| 30 | <i>Efae</i> | B6A4 | 50841666 | 47062579 | 6.6  | 5.2  | 0.3 |
| 31 | <i>Efae</i> | B6A4 | 45437286 | 42562754 | 6.2  | 4.9  | 0.3 |
| 32 | <i>Efae</i> | B6A4 | 62113778 | 57926378 | 6.6  | 5.2  | 0.3 |
| 33 | <i>Smar</i> | A4   | 20932070 | 19569646 | 10.7 | 0.1  | 0.3 |
| 34 | <i>Smar</i> | A4   | 22220731 | 20314035 | 7.7  | 0.1  | 0.3 |
| 35 | <i>Smar</i> | A4   | 13096294 | 12215786 | 11.5 | 0.1  | 0.3 |
| 36 | <i>Smar</i> | A4   | 19474264 | 17939316 | 10.8 | 0.0  | 0.3 |
| 37 | <i>Smar</i> | A4B6 | 46702136 | 13363924 | 5.2  | 6.3  | 0.6 |
| 38 | <i>Smar</i> | A4B6 | 42722535 | 19500222 | 6.1  | 6.7  | 0.5 |
| 39 | <i>Smar</i> | A4B6 | 70196188 | 17932361 | 6.0  | 6.8  | 0.5 |
| 40 | <i>Smar</i> | A4B6 | 49839957 | 22491147 | 5.7  | 6.5  | 0.5 |
| 41 | <i>Smar</i> | A4B6 | 48904532 | 45834532 | 6.3  | 6.7  | 0.5 |
| 42 | <i>Smar</i> | B6   | 9730094  | 9132793  | 0.4  | 10.4 | 0.5 |
| 43 | <i>Smar</i> | B6   | 11254219 | 10569215 | 0.4  | 11.7 | 0.4 |
| 44 | <i>Smar</i> | B6   | 16858117 | 15638969 | 0.2  | 10.3 | 0.8 |
| 45 | <i>Smar</i> | B6A4 | 45215266 | 8235284  | 6.4  | 4.8  | 0.2 |
| 46 | <i>Smar</i> | B6A4 | 70994061 | 11427623 | 6.0  | 4.7  | 0.3 |
| 47 | <i>Smar</i> | B6A4 | 54223062 | 50351817 | 6.8  | 5.4  | 0.4 |

**Supplemental Table S2: Increased stringency of problematic gene filtering minimally impacts overall number of *cis* and *trans* effects.**

For each treatment, using sets of genes filtered at various levels of stringency, we quantified the number of genes falling into each of the *cis* and *trans* categories. We found that within treatment conditions the number and proportions of genes did not greatly differ as we increased the stringency of filtering.

| Stringency    | Treatment   | <i>Cis</i> -only genes | <i>Trans</i> -only genes | <i>Cis</i> + <i>Trans</i> genes | Compensatory genes | Conserved genes | Undetermined genes |
|---------------|-------------|------------------------|--------------------------|---------------------------------|--------------------|-----------------|--------------------|
| Poisson Med   | Control     | 86                     | 16                       | 11                              | 38                 | 3808            | 1001               |
| Combined Low  | Control     | 89                     | 16                       | 10                              | 46                 | 3989            | 1046               |
| Combined Med  | Control     | 86                     | 16                       | 11                              | 38                 | 3808            | 1001               |
| Combined High | Control     | 86                     | 15                       | 13                              | 35                 | 3688            | 962                |
| Poisson Med   | <i>Efae</i> | 169                    | 73                       | 8                               | 6                  | 2586            | 1993               |
| Combined Low  | <i>Efae</i> | 177                    | 75                       | 8                               | 5                  | 2734            | 2064               |
| Combined Med  | <i>Efae</i> | 169                    | 73                       | 8                               | 6                  | 2586            | 1993               |
| Combined High | <i>Efae</i> | 165                    | 77                       | 8                               | 8                  | 2488            | 1929               |
| Poisson Med   | <i>Smar</i> | 72                     | 144                      | 6                               | 18                 | 4107            | 496                |
| Combined Low  | <i>Smar</i> | 77                     | 153                      | 6                               | 15                 | 4319            | 500                |
| Combined Med  | <i>Smar</i> | 72                     | 144                      | 6                               | 18                 | 4107            | 496                |
| Combined High | <i>Smar</i> | 69                     | 139                      | 7                               | 19                 | 3965            | 485                |

**Supplemental Table S3: Sequence changes in the list of candidate genes identified as being potential sources of *trans* effects.**

Of the 46 SNPs falling into the coding regions of 22 genes identified as potential *trans* sources, 37 SNPs resulted in amino acid substitutions in 12 genes. Roughly 20% (8 SNPs) of these SNPs fell into the phagocytic gene *NimC1* alone. In all cases, the majority of affected protein domains were in unnamed domains. Of the 5 PGRPs, only 2 (SC2 and SD) were found to carry mutations that resulted in coding region substitutions. These mutations fell into a transmembrane helix domain for *PGRP-SC2* but in an unknown domain for *PGRP-SD*. Additionally we found 5 missense mutations in *Spaetzle processing enzyme* and a single mutation in *Spaetzle*, though in both cases these mutations fell on unnamed protein domains. This underscores the large gap in our understanding of many of the domains important in the function of innate immunity genes and may serve as potential points of interest for future investigation.

| Location        | Allele | Gene Symbol    | Gene        | Feature     | CDS position | Protein position | Amino acids | Codons      | BLOSUM62 |
|-----------------|--------|----------------|-------------|-------------|--------------|------------------|-------------|-------------|----------|
| 2L:4122<br>351  | T      | <i>Sr-CI</i>   | FBgn0014033 | FBtr0346582 | 526          | 176              | H/Y         | Cac/Tac     | 2        |
| 2L:4122<br>897  | C      | <i>Sr-CI</i>   | FBgn0014033 | FBtr0077467 | 947          | 316              | S/T         | aGc/aC<br>c | 1        |
| 2L:4123<br>356  | T      | <i>Sr-CI</i>   | FBgn0014033 | FBtr0346582 | 1406         | 469              | K/M         | aAg/aTg     | -1       |
| 2L:8005<br>499  | A      | <i>Spn28Dc</i> | FBgn0031973 | FBtr0079549 | 763          | 255              | A/S         | Gcg/Tc<br>g | 1        |
| 2L:8005<br>523  | G      | <i>Spn28Dc</i> | FBgn0031973 | FBtr0079549 | 739          | 247              | I/L         | Att/Ctt     | 2        |
| 2L:8005<br>549  | G      | <i>Spn28Dc</i> | FBgn0031973 | FBtr0079549 | 713          | 238              | V/A         | gTc/gCc     | 0        |
| 2L:8006<br>451  | A      | <i>Spn28Dc</i> | FBgn0031973 | FBtr0079549 | 682          | 228              | T/S         | Aca/Tca     | 1        |
| 2L:8006<br>864  | C      | <i>Spn28Dc</i> | FBgn0031973 | FBtr0079549 | 269          | 90               | N/S         | aAc/aG<br>c | 1        |
| 2L:1396<br>8919 | C      | <i>NimB4</i>   | FBgn0028542 | FBtr0080617 | 832          | 278              | T/A         | Acc/Gc<br>c | 0        |
| 2L:1397<br>4306 | G      | <i>NimC1</i>   | FBgn0259896 | FBtr0080615 | 1787         | 596              | I/T         | aTa/aCa     | -1       |
| 2L:1397<br>4690 | T      | <i>NimC1</i>   | FBgn0259896 | FBtr0343644 | 1409         | 470              | P/H         | cCt/cAt     | -2       |

|                 |   |                      |                 |                 |      |      |     |             |    |
|-----------------|---|----------------------|-----------------|-----------------|------|------|-----|-------------|----|
| 2L:1397<br>4703 | G | <i>NimC1</i>         | FBgn02<br>59896 | FBtr008<br>0615 | 1390 | 464  | S/P | Tca/Cca     | -1 |
| 2L:1397<br>5363 | T | <i>NimC1</i>         | FBgn02<br>59896 | FBtr008<br>0615 | 730  | 244  | V/M | Gtg/Atg     | 1  |
| 2L:1397<br>5380 | T | <i>NimC1</i>         | FBgn02<br>59896 | FBtr008<br>0615 | 713  | 238  | G/D | gGc/gA<br>c | -1 |
| 2L:1397<br>5515 | G | <i>NimC1</i>         | FBgn02<br>59896 | FBtr008<br>0615 | 578  | 193  | V/A | gTc/gCc     | 0  |
| 2L:1397<br>5735 | T | <i>NimC1</i>         | FBgn02<br>59896 | FBtr008<br>0615 | 358  | 120  | G/S | Ggc/Ag<br>c | 0  |
| 2L:1397<br>6157 | C | <i>NimC1</i>         | FBgn02<br>59896 | FBtr034<br>3644 | 40   | 14   | S/A | Tca/Gca     | 1  |
| 2R:8717<br>036  | G | <i>PGRP-<br/>SC2</i> | FBgn00<br>43575 | FBtr008<br>8709 | 70   | 24   | I/V | Atc/Gtc     | 3  |
| 2R:1020<br>7902 | C | <i>Hr3</i>           | FBgn00<br>00448 | FBtr033<br>0609 | 1570 | 524  | P/A | Cca/Gc<br>a | -1 |
| 2R:1023<br>2873 | T | <i>Hr3</i>           | FBgn00<br>00448 | FBtr045<br>2140 | 439  | 147  | S/T | Tcg/Acg     | 1  |
| 2R:1023<br>7018 | G | <i>Hr3</i>           | FBgn00<br>00448 | FBtr011<br>2799 | 23   | 8    | N/T | aAc/aCc     | 0  |
| 3L:7651<br>752  | T | <i>PGRP-SD</i>       | FBgn00<br>35806 | FBtr007<br>6807 | 548  | 183  | S/F | tCc/tTc     | -2 |
| 3L:9441<br>876  | A | <i>Nf-YA</i>         | FBgn00<br>35993 | FBtr007<br>6504 | 17   | 6    | S/I | aGc/aTc     | -2 |
| 3R:7148<br>618  | C | <i>gfzf</i>          | FBgn02<br>50732 | FBtr033<br>4671 | 1480 | 494  | H/D | Cac/Ga<br>c | -1 |
| 3R:7150<br>621  | A | <i>gfzf</i>          | FBgn02<br>50732 | FBtr009<br>1512 | 10   | 4    | P/S | Ccc/Tcc     | -1 |
| 3R:2337<br>8558 | T | <i>CG4393</i>        | FBgn00<br>39075 | FBtr033<br>9617 | 3322 | 1108 | L/I | Tta/Ata     | 2  |
| 3R:2337         | C | <i>CG4393</i>        | FBgn00          | FBtr030         | 3313 | 1105 | P/A | Cca/Gc      | -1 |

|                 |   |             |                 |                 |      |      |     |             |    |
|-----------------|---|-------------|-----------------|-----------------|------|------|-----|-------------|----|
| 8567            |   |             | 39075           | 1085            |      |      |     | a           |    |
| 3R:2337<br>8571 | A | CG4393      | FBgn00<br>39075 | FBtr033<br>9616 | 3309 | 1103 | E/D | gaG/ga<br>T | 2  |
| 3R:2337<br>9640 | G | CG4393      | FBgn00<br>39075 | FBtr033<br>9617 | 2375 | 792  | Q/P | cAa/cCa     | -1 |
| 3R:2337<br>9641 | T | CG4393      | FBgn00<br>39075 | FBtr030<br>1085 | 2374 | 792  | Q/K | Caa/Aaa     | 1  |
| 3R:2338<br>1986 | T | CG4393      | FBgn00<br>39075 | FBtr030<br>1085 | 548  | 183  | T/N | aCc/aAc     | 0  |
| 3R:2706<br>6830 | G | <i>spz</i>  | FBgn00<br>03495 | FBtr008<br>5137 | 199  | 67   | T/P | Acc/Ccc     | -1 |
| 3R:3077<br>3707 | A | <i>zfh1</i> | FBgn00<br>04606 | FBtr033<br>1180 | 232  | 78   | Q/K | Cag/Aa<br>g | 1  |
| 3R:3077<br>4111 | T | <i>zfh1</i> | FBgn00<br>04606 | FBtr008<br>5701 | 386  | 129  | K/M | aAg/aTg     | -1 |
| 3R:3077<br>4123 | T | <i>zfh1</i> | FBgn00<br>04606 | FBtr033<br>1180 | 398  | 133  | A/V | gCc/gTc     | 0  |
| 3R:3077<br>4165 | C | <i>zfh1</i> | FBgn00<br>04606 | FBtr008<br>5701 | 440  | 147  | S/T | aGc/aC<br>c | 1  |
| 3R:3078<br>5831 | T | <i>zfh1</i> | FBgn00<br>04606 | FBtr008<br>5701 | 2861 | 954  | A/V | gCg/gT<br>g | 0  |

**Supplemental Table S4: Domains associated with sequence changes in the list of candidate genes identified as being potential sources of *trans* effects.**

List of protein domains affected by sequence changes in exonic regions from Supplemental Table S3.

| Location        | Allele | Gene Symbol    | Domains                                                                                                                    |
|-----------------|--------|----------------|----------------------------------------------------------------------------------------------------------------------------|
| 2L:4122351      | T      | <i>Sr-CI</i>   | Gene3D:2.60.120.200,Pfam:PF00629,PROSITE_profiles:PS50060,PANTHER:PTHR23282,SMART:SM00137,Superfamily:SSF49899,CDD:cd06263 |
| 2L:4122897      | C      | <i>Sr-CI</i>   | Gene3D:2.60.120.200,PANTHER:PTHR23282                                                                                      |
| 2L:4123356      | T      | <i>Sr-CI</i>   | PANTHER:PTHR23282,MobiDB_lite:mobidb-lite,Low_complexity_(Seg):seg                                                         |
| 2L:8005499      | A      | <i>Spn28Dc</i> | Gene3D:3.30.497.10,Pfam:PF00079,PANTHER:PTHR11461,PANTHER:PTHR11461:SF281,SMART:SM00093,Superfamily:SSF56574,CDD:cd00172   |
| 2L:8005523      | G      | <i>Spn28Dc</i> | Gene3D:3.30.497.10,Pfam:PF00079,PANTHER:PTHR11461,PANTHER:PTHR11461:SF281,SMART:SM00093,Superfamily:SSF56574,CDD:cd00172   |
| 2L:8005549      | G      | <i>Spn28Dc</i> | Gene3D:3.30.497.10,Pfam:PF00079,PANTHER:PTHR11461,PANTHER:PTHR11461:SF281,SMART:SM00093,Superfamily:SSF56574,CDD:cd00172   |
| 2L:8006451      | A      | <i>Spn28Dc</i> | Gene3D:3.30.497.10,Pfam:PF00079,PANTHER:PTHR11461,PANTHER:PTHR11461:SF281,SMART:SM00093,Superfamily:SSF56574,CDD:cd00172   |
| 2L:8006864      | C      | <i>Spn28Dc</i> | PANTHER:PTHR11461,PANTHER:PTHR11461:SF281,Superfamily:SSF56574                                                             |
| 2L:1396891<br>9 | C      | <i>NimB4</i>   | PANTHER:PTHR24047,Gene3D:2.10.25.10,SMART:SM00181                                                                          |
| 2L:1397430<br>6 | G      | <i>NimC1</i>   | PANTHER:PTHR24047,PANTHER:PTHR24047:SF29,Transmembrane_helices:TMhelix                                                     |
| 2L:1397469<br>0 | T      | <i>NimC1</i>   | PANTHER:PTHR24047,PANTHER:PTHR24047:SF29                                                                                   |
| 2L:1397470<br>3 | G      | <i>NimC1</i>   | PANTHER:PTHR24047,PANTHER:PTHR24047:SF29                                                                                   |
| 2L:1397536<br>3 | T      | <i>NimC1</i>   | Gene3D:2.10.25.10,PANTHER:PTHR24047,PANTHER:PTHR24047:SF29,SMART:SM00181,Superfamily:SSF57184                              |
| 2L:1397538<br>0 | T      | <i>NimC1</i>   | Gene3D:2.10.25.10,PANTHER:PTHR24047,PANTHER:PTHR24047:SF29,SMART:SM00181,Superfamily:SSF57184                              |
| 2L:1397551<br>5 | G      | <i>NimC1</i>   | Gene3D:2.10.25.10,PANTHER:PTHR24047,PANTHER:PTHR24047:SF29,SMART:SM00181                                                   |



|                 |   |                 |                                                                                                                        |
|-----------------|---|-----------------|------------------------------------------------------------------------------------------------------------------------|
| 2L:1397573<br>5 | T | <i>NimC1</i>    | Gene3D:2.10.25.10,PROSITE_patterns:PS00022,PANTHER:PTHR24047,PANTHER:PTHR24047:SF29,SMART:SM00181                      |
| 2L:1397615<br>7 | C | <i>NimC1</i>    | Cleavage_site_(Signalp):SignalP-noTM                                                                                   |
| 2R:871703<br>6  | G | <i>PGRP-SC2</i> | Gene3D:3.40.80.10,PIRSF:PIRSF037945,PANTHER:PTHR11022,SMART:SM00701,Superfamily:SSF55846,Transmembrane_helices:TMhelix |
| 2R:102079<br>02 | C | <i>Hr3</i>      | Low_complexity_(Seg):seg                                                                                               |
| 2R:102328<br>73 | T | <i>Hr3</i>      | -                                                                                                                      |
| 2R:102370<br>18 | G | <i>Hr3</i>      | PANTHER:PTHR45805,PANTHER:PTHR45805:SF2                                                                                |
| 3L:7651752      | T | <i>PGRP-SD</i>  | Gene3D:3.40.80.10,PIRSF:PIRSF037945,PANTHER:PTHR11022,PANTHER:PTHR11022:SF67,Superfamily:SSF55846                      |
| 3L:9441876      | A | <i>Nf-YA</i>    | -                                                                                                                      |
| 3R:714861<br>8  | C | <i>gfzf</i>     | PANTHER:PTHR43969,PANTHER:PTHR43969:SF7                                                                                |
| 3R:715062<br>1  | A | <i>gfzf</i>     | PANTHER:PTHR43969,PANTHER:PTHR43969:SF7                                                                                |
| 3R:233785<br>58 | T | <i>CG4393</i>   | PANTHER:PTHR24174,PANTHER:PTHR24174:SF1,MobiDB_lite:mobidb-lite                                                        |
| 3R:233785<br>67 | C | <i>CG4393</i>   | PANTHER:PTHR24174,PANTHER:PTHR24174:SF1,MobiDB_lite:mobidb-lite                                                        |
| 3R:233785<br>71 | A | <i>CG4393</i>   | PANTHER:PTHR24174,PANTHER:PTHR24174:SF1,MobiDB_lite:mobidb-lite                                                        |
| 3R:233796<br>40 | G | <i>CG4393</i>   | PANTHER:PTHR24174,PANTHER:PTHR24174:SF1,MobiDB_lite:mobidb-lite                                                        |
| 3R:233796<br>41 | T | <i>CG4393</i>   | PANTHER:PTHR24174,PANTHER:PTHR24174:SF1,MobiDB_lite:mobidb-lite                                                        |
| 3R:233819<br>86 | T | <i>CG4393</i>   | Gene3D:1.25.40.20,PROSITE_profiles:PS50297,PANTHER:PTHR24174,PANTHER:PTHR24174:SF1,Superfamily:SSF48403                |
| 3R:270668<br>30 | G | <i>spz</i>      | PANTHER:PTHR23199,PANTHER:PTHR23199:SF4                                                                                |

|             |   |             |                                                                                                                       |
|-------------|---|-------------|-----------------------------------------------------------------------------------------------------------------------|
| 3R:30773707 | A | <i>zfh1</i> | Pfam:PF13912,PROSITE_patterns:PS00028,PROSITE_profiles:PS50157,PANTHER:PTHR24391,PANTHER:PTHR24391:SF27,SMART:SM00355 |
| 3R:30774111 | T | <i>zfh1</i> | PANTHER:PTHR24391,PANTHER:PTHR24391:SF27,MobiDB_lite:mobidb-lite,MobiDB_lite:mobidb-lite                              |
| 3R:30774123 | T | <i>zfh1</i> | PANTHER:PTHR24391,PANTHER:PTHR24391:SF27,MobiDB_lite:mobidb-lite,MobiDB_lite:mobidb-lite,Low_complexity_(Seg):seg     |
| 3R:30774165 | C | <i>zfh1</i> | PANTHER:PTHR24391,PANTHER:PTHR24391:SF27,MobiDB_lite:mobidb-lite,MobiDB_lite:mobidb-lite,Low_complexity_(Seg):seg     |
| 3R:30785831 | T | <i>zfh1</i> | PANTHER:PTHR24391,PANTHER:PTHR24391:SF27                                                                              |

**Supplemental Table S5: Determination of ap-value threshold for transcription factor binding site analysis**

To determine an appropriate p-value threshold for identifying transcription factor binding sites (TFBS), we tested FIMO's ability to detect previously identified Rel and Srp binding sites in the upstream regions of four immune responsive genes. The Identified Rel sites and Identified Srp sites columns give the total identified binding sites for the selected TF by the FIMO utility. The Matched Rel sites and Matched Srp sites columns give the number of identified sites that match the previously described binding sites (Senger et al., 2004). The Missing Rel sites and Missing Srp sites columns give the number of previously identified sites that were not able to be detected by a given threshold. Based on this analysis, we used a p-value threshold of 0.001 for our TFBS analysis.

| <b>Genotype</b> | <b>P-value threshold</b> | <b>Identified Rel sites</b> | <b>Matched Rel sites</b> | <b>Missing Rel sites</b> | <b>Identified Srp sites</b> | <b>Matched Srp sites</b> | <b>Missing Srp sites</b> |
|-----------------|--------------------------|-----------------------------|--------------------------|--------------------------|-----------------------------|--------------------------|--------------------------|
| A4              | .001                     | 26                          | 10                       | 1                        | 13                          | 7                        | 0                        |
| A4              | .0001                    | 12                          | 4                        | 7                        | 7                           | 0                        | 7                        |
| B6              | .001                     | 29                          | 11                       | 0                        | 13                          | 7                        | 0                        |
| B6              | .0001                    | 12                          | 4                        | 7                        | 7                           | 0                        | 7                        |

## Supplemental References

Delignette-Muller, M. L., & Dutang, C. (2015). fitdistrplus: An R Package for Fitting Distributions. *Journal of Statistical Software*, 64(4), 1–34.

Kassambara, A., & Kosinski, M. (2019). Survminer: Drawing Survival Curves using “ggplot2.” Retrieved from <https://cran.r-project.org/package=survminer>

Therneau, T. M. (2020). A Package for Survival Analysis in R. Retrieved from <https://cran.r-project.org/package=survival>

Therneau, T. M. (2000). *Modeling Survival Data: Extending the {C}ox Model*. New York: Springer. Retrieved from <https://cran.r-project.org/package=survival>
